# Supplementary material for: Long-term and daily use of molecular hydrogen induces reprogramming of liver metabolism in rats by modulating NADP/NADPH redox pathways
Source: Springer Nature journal article supplement (doi:10.1038/s41598-022-07710-6), 2022-03-10
Supplement: 41598_2022_7710_MOESM4_ESM.pdf [file 41598_2022_7710_MOESM4_ESM.pdf]

## Long-Term and Daily Use of Molecular Hydrogen Induces Reprogramming of Liver Metabolism in Rats by Modulating NADP/NADPH Redox Pathways

Yao Mawulikplimi Adzavon<sup>1,2#</sup>, Fei Xie<sup>1,2#</sup>, Yang Yi<sup>1,2</sup>, Xue Jiang<sup>1,2</sup>, Xiaokang Zhang<sup>1,2</sup>, Jin He<sup>1,2</sup>, Pengxiang Zhao<sup>1,2</sup>, Mengyu Liu<sup>1,2</sup>, Shiwen Ma<sup>1,2</sup>, Xuemei MA<sup>1,2\*</sup>

Supplementary figure 1

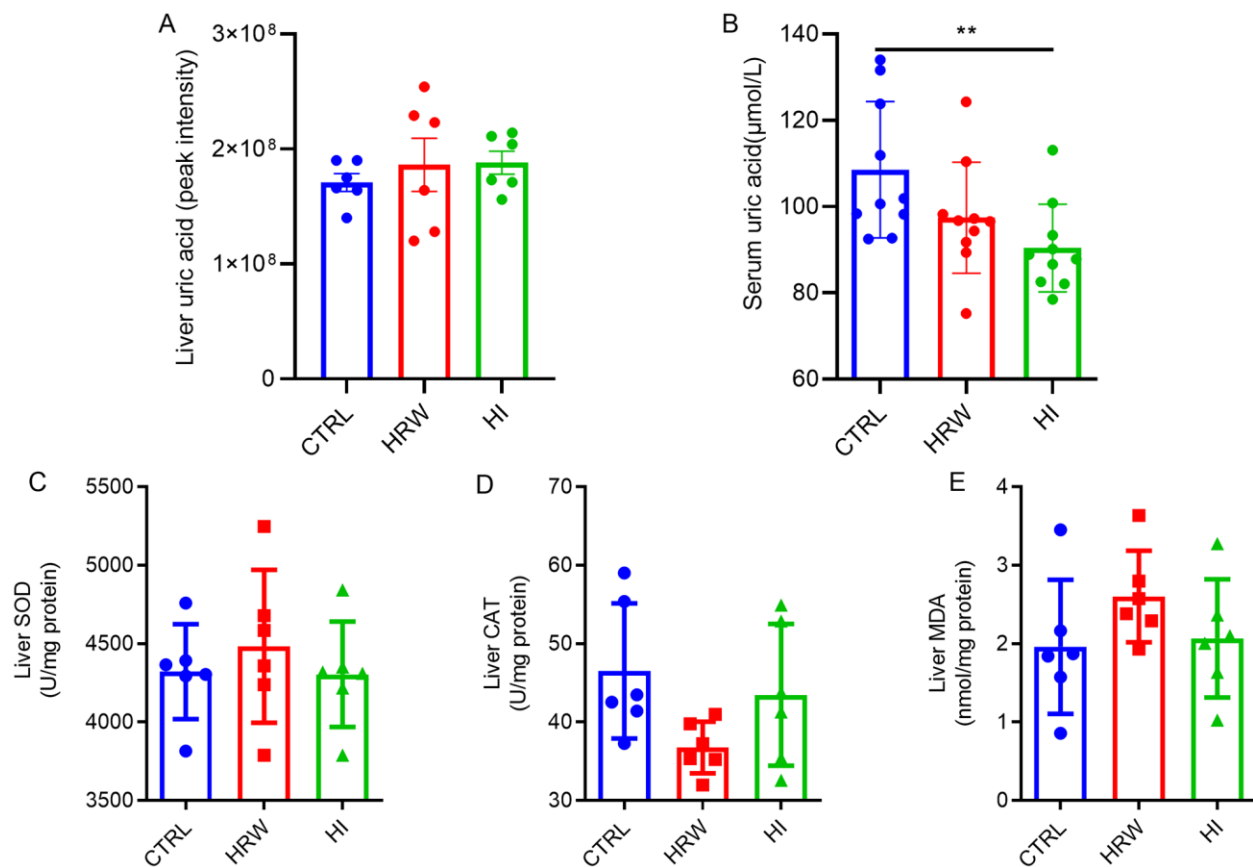

Effect of long-term H<sub>2</sub> intervention on the level of Uric acid analyzed by metabolomics in the liver (A) and by ELISA in serum (B) of healthy rats. (C-E) Indicators of oxidative stress in liver of H<sub>2</sub>-treated rats compared to untreated rats: enzymatic activity of SOD (superoxide dismutase), CAT (catalase), and the concentration of MDA (Malondialdehyde) was measured by ELISA in liver lysates. Data are presented as Mean ± SEM. \* p-value < 0.05; \*\* p-value < 0.01; \*\*\* p-value < 0.001
