# Supplementary material for: Long-term and daily use of molecular hydrogen induces reprogramming of liver metabolism in rats by modulating NADP/NADPH redox pathways
Source: PubMed Central journal article supplement (PMC8913832; doi:10.1038/s41598-022-07710-6), 2022-03-10
Supplement: 41598_2022_7710_MOESM7_ESM.pdf [file 41598_2022_7710_MOESM7_ESM.pdf]

## Long-Term and Daily Use of Molecular Hydrogen Induces Reprogramming of Liver Metabolism in Rats by Modulating NADP/NADPH Redox Pathways

Yao Mawulikplimi Adzavon<sup>1,2#</sup>, Fei Xie<sup>1,2#</sup>, Yang Yi<sup>1,2</sup>, Xue Jiang<sup>1,2</sup>, Xiaokang Zhang<sup>1,2</sup>, Jin He<sup>1,2</sup>, Pengxiang Zhao<sup>1,2</sup>, Mengyu Liu<sup>1,2</sup>, Shiwen Ma<sup>1,2</sup>, Xuemei MA<sup>1,2\*</sup>

Supplementary figure 4

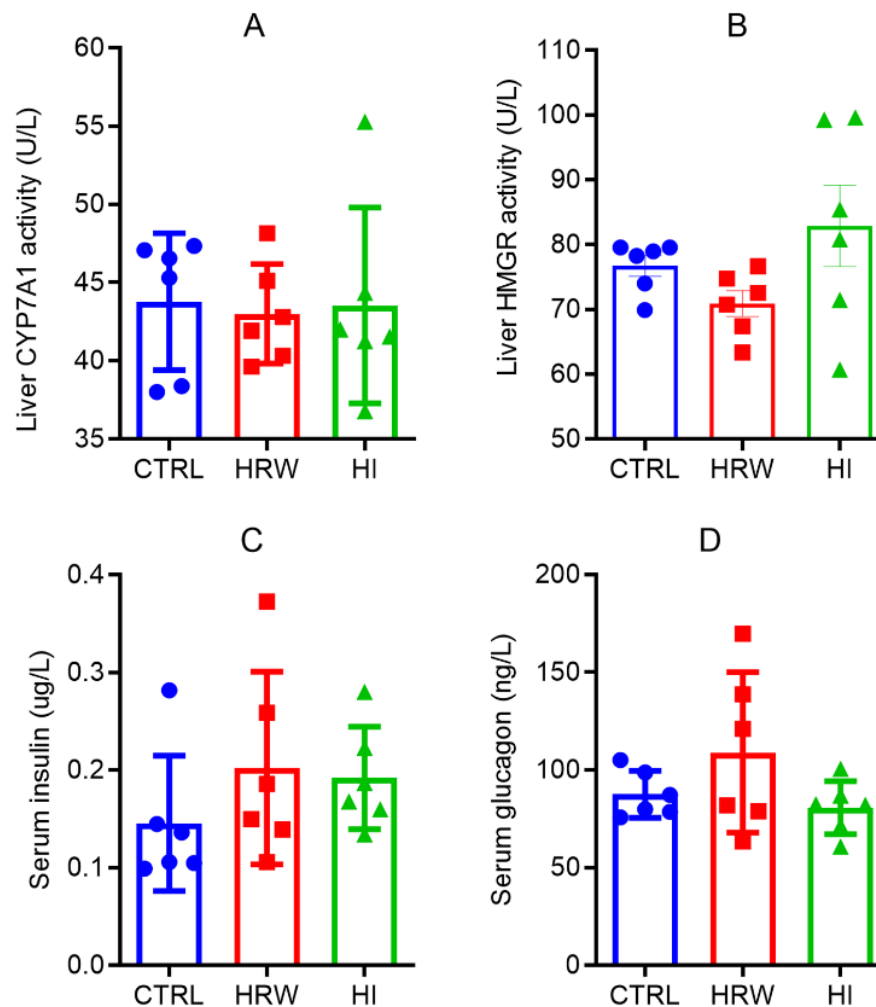

Change in the enzymatic activity of HMGR and CYP7A1 detected from liver lysates, and serum level of insulin and glucagon of rats exposed daily to H<sub>2</sub> for 6 months. Data are presented as Mean  $\pm$  SEM. \* p-value < 0.05; \*\* p-value < 0.01; \*\*\* p-value < 0.001
